# Supplementary material for: Large-Scale Evaluation and Liver Disease Risk Prediction in Finland’s National Electronic Health Record System: Feasibility Study Using Real-World Data
Source: JMIR Med Inform. 2025 Apr 2;13:e62978. doi: 10.2196/62978 (PMC12004021; doi:10.2196/62978)
Supplement: Multimedia Appendix 1 [file medinform_v13i1e62978_app1.docx]

# Appendix 1: Risk calculation formula

and are both described in detail at the publication [1] and we won’t repeat functions here. Here we describe the input data and functions application to real-world data used in this study. The first we define person input data model. Let’s denote input model to be , where:

See the original paper [1] for complete diabetes definitions.

For the complete smoking information data transformation from diagnosis information see the Appendix 1 and 2.

The next we define functions for calculating the minimum and maximum risk as follows:

Risk category is defined as follows:

## References

[1] Development and validation of a model to predict incident chronic liver disease in the general population: The CLivD score, Åberg, Fredrik et al., Journal of Hepatology, Volume 77, Issue 2, 302 - 311
